# Supplementary material
Source: HighWire-hosted journal article supplement (https://jnm.snmjournals.org/highwire/filestream/94977/field_highwire_adjunct_files/0/171033_Supplemental_Data.pdf)
Supplement: 171033_Supplemental_Data.pdf [file 171033_Supplemental_Data.pdf]

**Supplemental Table 1** MR and PET findings compared to baseline at the time of tumor progression and malignant transformation

| Patient No. | Initial WHO grade | Initial treatment  | No. of PET | Progression                  |                         |                    |            | Malignant Transformation             |                         |                    |            |                     |               |
|-------------|-------------------|--------------------|------------|------------------------------|-------------------------|--------------------|------------|--------------------------------------|-------------------------|--------------------|------------|---------------------|---------------|
|             |                   |                    |            | Time to progression (months) | MRI changes             | Clinical worsening | FET-uptake | Time to mal. Transformation (months) | MRI changes             | Clinical worsening | FET-uptake | Evaluation by       | New WHO grade |
| 1           | II                | Surgical resection | 4          | 56.0                         | T2 enlargement          | -                  | Yes        | -                                    | -                       | -                  | -          | -                   | -             |
| 2           | II                | Brachytherapy      | 4          | 104.6                        | New CE                  | -                  | Yes        | -                                    | -                       | -                  | -          | -                   | -             |
| 3           | II                | Temozolomide       | 4          | 51.9                         | T2 enlargement          | seizures           | Yes        | -                                    | -                       | -                  | -          | -                   | -             |
| 4           | II                | Watch-and-wait     | 11         | 48.2                         | T2 enlargement          | -                  | Yes        | -                                    | -                       | -                  | -          | -                   | -             |
| 5           | II                | Watch-and-wait     | 12         | 21.1                         | New CE                  | -                  | Yes        | 28.7                                 | New CE                  | -                  | Yes        | Histology (surgery) | IV            |
| 6           | III               | Surgical resection | 4          | 29.1                         | T2 enlargement          | -                  | Yes        | 41.1                                 | New CE                  | seizures           | Yes        | MRI                 | n.a.          |
| 7           | II                | Watch-and-wait     | 4          | 29.5                         | New CE + T2 enlargement | -                  | Yes        | 29.5                                 | New CE + T2 enlargement | -                  | Yes        | MRI                 | n.a.          |
| 8           | II                | Watch-and-wait     | 9          | 24.7                         | New CE                  | seizures           | Yes        | 24.7                                 | New CE                  | seizures           | Yes        | Histology (surgery) | III           |
| 9           | II                | Radiochemotherapy  | 8          | 30.9                         | none                    | seizures           | Yes        | 33.0                                 | none                    | seizures           | Yes        | Histology (biopsy)  | III           |
| 10          | II                | Brachytherapy      | 5          | 10.2                         | New CE                  | -                  | Yes        | 10.2                                 | New CE                  | none               | Yes        | Histology (biopsy)  | IV            |
| 11          | II                | Watch-and-wait     | 9          | 50.6                         | New CE + T2 enlargement | seizures           | Yes        | 50.7                                 | New CE + T2 enlargement | seizures           | Yes        | Histology (surgery) | IV            |
| 12          | II                | Brachytherapy      | 4          | 10.2                         | New CE + T2 enlargement | aphasia            | Yes        | 10.2                                 | New CE + T2 enlargement | aphasia            | Yes        | Histology (biopsy)  | IV            |
| 13          | II                | Surgical resection | 4          | 69.9                         | New CE + T2 enlargement | -                  | Yes        | 69.9                                 | New CE + T2 enlargement | -                  | Yes        | Histology (surgery) | III           |
| 14          | II                | Watch-and-wait     | 2          | 8.0                          | New CE + T2 enlargement | -                  | Yes        | 8.0                                  | New CE + T2 enlargement | -                  | Yes        | Histology (biopsy)  | IV            |

|    |     |                    |   |      |                         |                                 |      |      |                         |                                 |      |                     |     |
|----|-----|--------------------|---|------|-------------------------|---------------------------------|------|------|-------------------------|---------------------------------|------|---------------------|-----|
| 15 | II  | Brachytherapy      | 3 | 53.5 | New CE                  | motor and sensibility disorders | n.a. | 53.7 | New CE                  | motor and sensibility disorders | Yes  | Histology (biopsy)  | IV  |
| 16 | II  | Radiochemotherapy  | 2 | 22.3 | T2 enlargement          | oculomotor deficit              | n.a. | 35.0 | New CE                  | Oculomotor deficit              | Yes  | Histology (surgery) | IV  |
| 17 | II  | Watch-and-wait     | 3 | 12.2 | New CE + T2 enlargement | seizures                        | Yes  | 12.4 | New CE + T2 enlargement | seizures                        | Yes  | Histology (biopsy)  | IV  |
| 18 | II  | Surgical resection | 4 | 15.2 | New CE + T2 enlargement | seizures, imbalance             | Yes  | 15.3 | New CE + T2 enlargement | seizures, imbalance             | Yes  | Histology (biopsy)  | IV  |
| 19 | II  | Radiochemotherapy  | 3 | 44.5 | T2 enlargement          | Seizures, sensibility disorders | Yes  | 41.7 | T2 enlargement          | -                               | Yes  | Histology (biopsy)  | III |
| 20 | II  | Surgical resection | 7 | 41.1 | T2 enlargement          | -                               | Yes  | 50.7 | New CE + T2 enlargement | -                               | yes  | Histology (surgery) | IV  |
| 21 | II  | Temozolomide       | 3 | -    | none                    | -                               | None | -    | -                       | -                               | -    | -                   | -   |
| 22 | II  | Surgical resection | 2 | -    | none                    | -                               | None | -    | -                       | -                               | -    | -                   | -   |
| 23 | II  | Surgical resection | 3 | -    | none                    | -                               | None | -    | -                       | -                               | -    | -                   | -   |
| 24 | III | Watch-and-wait     | 4 | 28.1 | T2 enlargement          | -                               | None | -    | -                       | -                               | -    | -                   | -   |
| 25 | III | Surgery            | 8 | -    | none                    | -                               | None | -    | -                       | -                               | -    | -                   | -   |
| 26 | III | Temozolomide       | 4 | -    | none                    | -                               | None | -    | -                       | -                               | -    | -                   | -   |
| 27 | III | Surgery            | 3 | -    | none                    | -                               | None | -    | -                       | -                               | -    | -                   | -   |
| 28 | II  | Radiochemotherapy  | 4 | -    | none                    | -                               | None | -    | -                       | -                               | -    | -                   | -   |
| 29 | II  | Brachytherapy      | 3 | -    | none                    | -                               | None | -    | -                       | -                               | -    | -                   | -   |
| 30 | II  | Watch-and-wait     | 2 | 4.7  | T2 enlargement          | -                               | None | 22.2 | New CE + T2 enlargement | seizures                        | n.a. | Histology (biopsy)  | IV  |
| 31 | II  | Watch-and-wait     | 3 | 24.8 | T2 enlargement          | -                               | None | 42.7 | T2 enlargement          | -                               | None | Histology (surgery) | III |

n.a. not available; CE Contrast-enhancement on MRI
